# Supplementary material
Source: PubMed Central journal article supplement (PMC4173684)
Supplement: rspb20141468supp1.pdf [file rspb20141468supp1.pdf]

| code      | age (day) | sex | total<br>viewing<br>rate | side bias | viewing duration (sec) |        | viewing rate |          |         |          | number of gaze<br>switch |        |
|-----------|-----------|-----|--------------------------|-----------|------------------------|--------|--------------|----------|---------|----------|--------------------------|--------|
|           |           |     |                          |           | luminance              | s-cone | luminance    |          | S-cone  |          | luminance                | s-cone |
|           |           |     |                          |           |                        |        | upright      | inverted | upright | inverted |                          |        |
| 2month_1  | 73        | M   | 0.57                     | 0.44      | 16                     | 24     | 0.41         | 0.57     | 0.93    | 0.06     | 19                       | 13     |
| 2month_2  | 88        | M   | 0.48                     | 0.57      | 14                     | 20     | 0.48         | 0.52     | 0.73    | 0.27     | 14                       | 24     |
| 2month_3  | 75        | M   | 0.73                     | 0.22      | 26                     | 25     | 0.41         | 0.59     | 0.65    | 0.35     | 37                       | 10     |
| 2month_4  | 73        | M   | 0.82                     | 0.61      | 28                     | 29     | 0.54         | 0.45     | 0.90    | 0.09     | 13                       | 7      |
| 2month_5  | 78        | F   | 0.80                     | 0.20      | 30                     | 26     | 0.32         | 0.68     | 0.47    | 0.53     | 21                       | 19     |
| 2month_6  | 68        | M   | 0.79                     | 0.28      | 32                     | 24     | 0.48         | 0.51     | 0.58    | 0.42     | 19                       | 18     |
| 2month_7  | 86        | F   | 0.73                     | 0.79      | 27                     | 24     | 0.72         | 0.28     | 0.49    | 0.51     | 27                       | 25     |
| 2month_8  | 77        | F   | 0.84                     | 0.50      | 29                     | 30     | 0.50         | 0.50     | 0.26    | 0.74     | 53                       | 32     |
| 2month_9  | 86        | M   | 0.61                     | 0.73      | 23                     | 20     | 0.26         | 0.74     | 0.55    | 0.45     | 36                       | 18     |
| 2month_10 | 80        | F   | 0.89                     | 0.35      | 30                     | 32     | 0.61         | 0.38     | 1.00    | 0.00     | 17                       | 2      |
| 2month_11 | 88        | M   | 0.85                     | 0.37      | 33                     | 27     | 0.72         | 0.27     | 0.80    | 0.20     | 8                        | 24     |
| 2month_12 | 74        | M   | 0.93                     | 0.75      | 34                     | 32     | 0.50         | 0.50     | 0.78    | 0.21     | 1                        | 12     |
| 2month_13 | 74        | F   | 0.84                     | 0.74      | 30                     | 29     | 0.43         | 0.57     | 0.51    | 0.48     | 46                       | 11     |
| 2month_14 | 81        | F   | 0.96                     | 0.42      | 32                     | 35     | 0.67         | 0.32     | 0.46    | 0.53     | 8                        | 2      |
| 2month_15 | 85        | M   | 0.89                     | 0.23      | 34                     | 29     | 0.53         | 0.47     | 0.53    | 0.46     | 5                        | 43     |
| 2month_16 | 79        | F   | 0.80                     | 0.56      | 29                     | 19     | 0.61         | 0.38     | 0.53    | 0.45     | 33                       | 22     |
| mean      | 79.06     |     | 0.78                     | 0.48      | 28                     | 27     | 0.51         | 0.48     | 0.64    | 0.36     | 22.31                    | 17.63  |

| code      | age (day) | sex | total<br>viewing<br>rate | side bias | viewing duration (sec) |        | viewing rate |          |         |          | number of gaze<br>switch |        |
|-----------|-----------|-----|--------------------------|-----------|------------------------|--------|--------------|----------|---------|----------|--------------------------|--------|
|           |           |     |                          |           | luminance              | s-cone | luminance    |          | S-cone  |          | luminance                | s-cone |
|           |           |     |                          |           |                        |        | upright      | inverted | upright | inverted |                          |        |
| 4month_1  | 145       | M   | 0.93                     | 0.74      | 33                     | 32     | 0.44         | 0.53     | 0.93    | 0.07     | 7                        | 6      |
| 4month_2  | 146       | F   | 0.67                     | 0.47      | 25                     | 20     | 0.58         | 0.37     | 0.61    | 0.36     | 18                       | 33     |
| 4month_3  | 123       | F   | 0.95                     | 0.33      | 34                     | 33     | 0.98         | 0.01     | 0.67    | 0.33     | 5                        | 8      |
| 4month_4  | 129       | F   | 0.91                     | 0.73      | 33                     | 30     | 0.78         | 0.21     | 0.56    | 0.42     | 9                        | 29     |
| 4month_5  | 135       | F   | 0.77                     | 0.39      | 33                     | 22     | 0.56         | 0.44     | 0.77    | 0.23     | 8                        | 17     |
| 4month_6  | 129       | M   | 0.91                     | 0.55      | 34                     | 30     | 0.83         | 0.15     | 0.53    | 0.46     | 14                       | 31     |
| 4month_7  | 122       | M   | 0.94                     | 0.28      | 33                     | 33     | 0.71         | 0.29     | 0.54    | 0.46     | 13                       | 27     |
| 4month_8  | 130       | F   | 0.91                     | 0.28      | 32                     | 31     | 0.59         | 0.38     | 0.83    | 0.15     | 13                       | 25     |
| 4month_9  | 139       | M   | 1.00                     | 0.83      | 35                     | 35     | 0.57         | 0.43     | 0.51    | 0.49     | 2                        | 19     |
| 4month_10 | 132       | F   | 0.91                     | 0.43      | 33                     | 30     | 0.29         | 0.71     | 0.53    | 0.44     | 8                        | 16     |
| 4month_11 | 134       | M   | 0.98                     | 0.34      | 35                     | 34     | 0.86         | 0.12     | 0.81    | 0.19     | 3                        | 5      |
| 4month_12 | 143       | F   | 0.95                     | 0.41      | 35                     | 32     | 0.77         | 0.23     | 0.53    | 0.46     | 5                        | 40     |
| 4month_13 | 134       | F   | 0.88                     | 0.39      | 30                     | 32     | 0.44         | 0.55     | 0.54    | 0.46     | 23                       | 20     |
| 4month_14 | 143       | M   | 0.83                     | 0.40      | 28                     | 30     | 0.90         | 0.09     | 0.73    | 0.27     | 9                        | 23     |
| 4month_15 | 135       | F   | 0.98                     | 0.43      | 35                     | 33     | 0.93         | 0.07     | 0.62    | 0.35     | 4                        | 20     |
| 4month_16 | 133       | M   | 0.87                     | 0.29      | 32                     | 29     | 0.53         | 0.46     | 0.79    | 0.21     | 7                        | 16     |
| 4month_17 | 136       | M   | 0.86                     | 0.62      | 31                     | 28     | 0.84         | 0.15     | 0.46    | 0.50     | 9                        | 23     |
| mean      | 134.59    |     | 0.90                     | 0.46      | 32                     | 30     | 0.68         | 0.30     | 0.64    | 0.34     | 9.24                     | 21.06  |

| code      | age (day) | sex | total<br>viewing<br>rate | side bias | viewing duration (sec) |        | viewing rate |          |         |          | number of gaze<br>switch |        |
|-----------|-----------|-----|--------------------------|-----------|------------------------|--------|--------------|----------|---------|----------|--------------------------|--------|
|           |           |     |                          |           | luminance              | s-cone | luminance    |          | S-cone  |          | luminance                | s-cone |
|           |           |     |                          |           |                        |        | upright      | inverted | upright | inverted |                          |        |
| 6month_1  | 213       | F   | 0.97                     | 0.53      | 33                     | 34     | 0.59         | 0.39     | 0.63    | 0.35     | 25                       | 29     |
| 6month_2  | 203       | F   | 0.54                     | 0.36      | 18                     | 20     | 0.68         | 0.32     | 0.55    | 0.45     | 13                       | 29     |
| 6month_3  | 209       | M   | 0.74                     | 0.59      | 29                     | 23     | 0.63         | 0.37     | 0.58    | 0.37     | 20                       | 20     |
| 6month_4  | 204       | F   | 0.93                     | 0.50      | 34                     | 29     | 0.67         | 0.29     | 0.49    | 0.47     | 9                        | 25     |
| 6month_5  | 204       | F   | 0.96                     | 0.44      | 33                     | 33     | 0.52         | 0.42     | 0.67    | 0.31     | 25                       | 32     |
| 6month_6  | 199       | F   | 0.86                     | 0.72      | 33                     | 28     | 0.64         | 0.35     | 0.72    | 0.27     | 14                       | 29     |
| 6month_7  | 201       | F   | 0.93                     | 0.32      | 34                     | 30     | 0.46         | 0.53     | 0.50    | 0.46     | 26                       | 36     |
| 6month_8  | 194       | F   | 0.50                     | 0.60      | 22                     | 13     | 0.55         | 0.45     | 0.64    | 0.34     | 23                       | 34     |
| 6month_9  | 192       | F   | 0.66                     | 0.75      | 21                     | 24     | 0.40         | 0.55     | 0.62    | 0.37     | 12                       | 22     |
| 6month_10 | 210       | F   | 0.86                     | 0.61      | 33                     | 28     | 0.52         | 0.48     | 0.46    | 0.53     | 19                       | 41     |
| 6month_11 | 206       | M   | 0.93                     | 0.27      | 32                     | 32     | 0.45         | 0.52     | 0.59    | 0.39     | 18                       | 25     |
| 6month_12 | 196       | F   | 0.77                     | 0.28      | 29                     | 24     | 0.51         | 0.48     | 0.63    | 0.37     | 17                       | 25     |
| 6month_13 | 197       | M   | 0.80                     | 0.60      | 30                     | 26     | 0.39         | 0.59     | 0.70    | 0.28     | 17                       | 27     |
| 6month_14 | 193       | M   | 0.85                     | 0.39      | 32                     | 28     | 0.56         | 0.44     | 0.57    | 0.42     | 18                       | 38     |
| 6month_15 | 200       | F   | 0.79                     | 0.37      | 34                     | 21     | 0.47         | 0.52     | 0.63    | 0.35     | 17                       | 21     |
| 6month_16 | 199       | M   | 0.92                     | 0.45      | 34                     | 31     | 0.76         | 0.24     | 0.68    | 0.32     | 13                       | 20     |
| 6month_17 | 208       | M   | 0.74                     | 0.69      | 32                     | 20     | 0.63         | 0.37     | 0.59    | 0.40     | 14                       | 32     |
| mean      | 201.65    |     | 0.81                     | 0.50      | 30                     | 26     | 0.56         | 0.43     | 0.60    | 0.38     | 17.65                    | 28.53  |
